# Supplementary material
Source: Springer Nature journal article supplement (https://www.springermedizin.de/resource/supplementary/12245_2011_100_MOESM3_ESM.pdf/9672772)
Supplement: MOESM3 [file 9672772]

RIGHT

Z: 1  
C: 32767  
W: 65523  
Compressed 20:1  
IM: 39
